# Supplementary material for: Influence of intra-skeletal coral lipids on calcium carbonate precipitation
Source: Royal Society of Chemistry journal article supplement (doi:10.1039/c6ce01939k), 2016-01-01
Supplement: c6ce01939k1.pdf [file c6ce01939k1.pdf]

## Supplementary Information

### Influence of Intra-Skeletal Coral Lipids on Calcium Carbonate Precipitation

M. Reggi,<sup>a</sup> S. Fermani,<sup>a</sup> C. Samorì,<sup>a, b</sup> F. Gizzi,<sup>c</sup> F. Prada,<sup>c</sup> Z. Dubinsky,<sup>d</sup> S. Goffredo,<sup>\*, c</sup> and G. Falini<sup>\*, a</sup>

<sup>a</sup>*Dipartimento di Chimica “Giacomo Ciamician”, Alma Mater Studiorum- Università di Bologna, via Selmi 2, 40126 Bologna, Italy.* <sup>b</sup>*Centro Interdipartimentale di Ricerca in Scienze Ambientali, Sede di Ravenna- Università di Bologna, via S. Alberto 163, 48100 Ravenna, Italy.* <sup>c</sup>*Marine Science Group, Department of Biological, Geological and Environmental Sciences, Alma Mater Studiorum - Università di Bologna, Via Selmi 3, I-40126 Bologna, Italy.* <sup>d</sup>*The Mina & Everard Goodman Faculty of Life Sciences, Bar-Ilan University, Ramat-Gan 5290002, Israel*

|                       |          |
|-----------------------|----------|
| Materials and Methods | pag. S12 |
| Table ESI1            | pag. S14 |
| Figure ESI1           | pag. S15 |
| Figure ESI2           | pag. S15 |
| Figure ESI3           | pag. S16 |
| Figure ESI4           | pag. S16 |
| References            | pag. S17 |

## Materials and Methods

### *Extraction of organic matrix and lipids*

The samples of *B. europaea*, *A. calycularis* from Palinuro (Italian coast, North-Western Mediterranean Sea) and *S. pistillata* from the Gulf of Eilat (Red Sea, Israel) were randomly collected by scuba diving at 6, 9, 10 m depth respectively. Coral skeletons were cleaned, ground, and whole organic matrix (wOM) was extracted through decalcification using 0.1 M acetic acid solution as previously reported.<sup>1</sup> All wOMs were characterized by Fourier transform infrared spectroscopy (FTIR) using a Bruker Alpha FTIR spectrometer equipped with a single- reflection diamond ATR accessory working in the range of wavenumbers 4000-400 cm<sup>-1</sup> at a resolution of 4 cm<sup>-1</sup>.

After characterization, the lipid components (*lipOM*) were extracted from the wOM. To extract lipids, the wOM was dissolved in a DCM:MeOH solution (1:1 v/v) under stirring for four days. Then the solution was centrifuged and the supernatant was allowed to evaporate under a fume hood.

### *Lipid analysis*

Powder of coral skeleton samples (about 50 mg) were extracted under reflux with chloroform/methanol mixture (2:1 v/v, 4 mL) for 1.5 h; the solvent phase was then removed and the procedure was repeated three times. The solvent phases were collected and concentrated by evaporation. The total fatty acids content was determined as follows: the lipid extracts were dissolved in dimethylcarbonate (0.4 mL), 2,2-dimethoxypropane (0.1 mL) and 0.5 M NaOH in MeOH (0.1 mL), and then placed in an incubator at 90 °C for 30 min. After cooling for 5 min to room temperature, 1.3 M BF<sub>3</sub>-methanol 10% (w/w) reagent (0.7 mL) was added before repeating the incubation for 30 min. After cooling for 5 min to room temperature, saturated NaCl aqueous solution (2 mL) and hexane (1 mL) containing methyl nonadecanoate (20 µg) were added and the samples were centrifuged at 4000 rpm for 1 min. The upper hexane-dimethylcarbonate layer, containing fatty acids, was transferred to vials for GC-MS analysis. The analyses were performed on 3 replicates of each coral.

GC-MS analyses were performed using a 6850 Agilent HP gas chromatograph connected to a 5975 Agilent HP quadrupole mass spectrometer. The injection port temperature was 280 °C. Analytes were separated by a HP-5 fused-silica capillary column (stationary phase poly [5% diphenyl/95% dimethyl] siloxane, 30 m, 0.25 mm i.d., 0.25 µm film thickness), with helium as carrier gas (at constant pressure, 33 cm s<sup>-1</sup> linear velocity at 200 °C). Mass spectra were recorded under electron ionization (70 eV) at a frequency of 1 scan s<sup>-1</sup> within the 12-600 m/z range. The temperature of the column was increased from 50°C up to 180 °C at 50 °C min<sup>-1</sup>, then from 180 °C up to 300 °C at 5 °C min<sup>-1</sup>. Methyl nonadecanoate was used as internal standard for the quantification of each fatty acid, by assuming a unitary response factor.

All *lipOMs* were characterized by Fourier transform infrared spectroscopy (FTIR) using a Bruker Alpha FTIR spectrometer equipped with a single- reflection diamond ATR accessory working in the range of wavenumber 4000-400 cm<sup>-1</sup> at a resolution of 4 cm<sup>-1</sup>.

Dynamic light scattering was used for determination of the lipids particles size distribution employing a Malvern Nano ZS instrument with a 633 nm laser diode according to a reported procedure.<sup>2</sup>

#### *Calcium carbonate crystallization experiments*

Calcium carbonate ( $\text{CaCO}_3$ ) *in vitro* crystallization experiments were carried out by vapour diffusion in a desiccator containing  $(\text{NH}_4)_2\text{CO}_3$  (Carlo Erba) and anhydrous  $\text{CaCl}_2$  (Sigma Aldrich). Microplates for cellular culture (MICROPLATE 24 well with Lid, IWAKI), containing a round glass cover slip in each well, were used as previously reported.<sup>1</sup> In each well, 750  $\mu\text{L}$  of 10 mM  $\text{CaCl}_2$  solutions ( $\text{CaCl}_2$ -dihydrate, Sigma-Aldrich) were poured. 0.2 mg of whole OM were added into wells. Lipid components (100  $\mu\text{g}/\text{mL}$ ) were dispersed directly in a 10 mM  $\text{CaCl}_2$  solution. To obtain a homogeneous dispersion, the solutions were sonicated with a Falc ultrasonic UTA bath for 20 minutes. After that 750  $\mu\text{L}$  of  $\text{CaCl}_2$ /lipids dispersion were added into wells. Microplates were located in desiccator for 4 days at room temperature. The obtained crystals were washed with milli-Q water and dried.  $\text{CaCO}_3$  crystallization experiments were replicated at least four times. Lower concentrations of lipid dispersions did not affect the crystallization of  $\text{CaCO}_3$ .

Characterization of  $\text{CaCO}_3$  precipitates was carried out by FTIR spectroscopy and microscopic observations. FTIR spectra of samples in KBr disks were collected at room temperature by using a Bruker Alpha FTIR spectrometer equipped with a single- reflection diamond ATR accessory working in the range of 4000-400  $\text{cm}^{-1}$  at a resolution of 4  $\text{cm}^{-1}$ . Optical microscope observations of  $\text{CaCO}_3$  precipitates were carried out using a Leica microscope equipped with a digital camera. SEM observations were conducted using a Hitachi FEG 6400 scanning electron microscope after sample coating with gold.

**Table ES11:** Assignment of organic compounds to bands on the FTIR spectra of *lipOM*;  $\nu$ -stretching vibration,  $\delta$ -bending vibrations, *s*-symmetric and *as*-asymmetric.

| Wave number<br>( $\text{cm}^{-1}$ ) | Assignment                                                               |
|-------------------------------------|--------------------------------------------------------------------------|
| 3422                                | $\nu(\text{O-H})$ and $\nu(\text{N-H})$ : water molecules and choline    |
| 2956                                | $\nu_{\text{as}}(\text{CH}_3)$ : lipids, cholesterol esters, fatty acids |
| 2921                                | $\nu_{\text{as}}(\text{CH}_2)$ : lipids, long-chain fatty acids          |
| 2872                                | $\nu_{\text{s}}(\text{CH}_3)$ : lipids, fatty acids                      |
| 2851                                | $\nu_{\text{s}}(\text{CH}_2)$ : lipids, long-chain fatty acids           |
| 1735                                | $\nu(\text{C=O})$ : lipids, cholesterol esters, fatty acids oxides       |
| 1720                                | $\nu(\text{C=O})$ : COOH group of fatty acids                            |
| 1685-1634                           | Amide I: ceramides                                                       |
| 1578                                | $\nu_{\text{as}}(\text{C=O})$ : $\text{COO}^-$ group of fatty acids      |
| 1540                                | $\nu_{\text{s}}(\text{C=O})$ : $\text{COO}^-$ group of fatty acids       |
| 1470                                | $\delta(\text{CH}_2)$ : aliphatic chains of fatty acids                  |
| 1384                                | $\delta(\text{CH}_3)$ : aliphatic chains of fatty acids                  |
| 1206                                | $\nu_{\text{as}}(\text{C-O})$ : lipid ester bonds                        |
| 1112                                | $\nu_{\text{s}}(\text{PO}_2)$ : phospholipids                            |
| 1026                                | $\nu_{\text{s}}(\text{PO}_2)$ : phospholipids                            |

The broad band detected around  $3422 \text{ cm}^{-1}$  was assigned to  $\nu(\text{O-H})$  and  $\nu(\text{N-H})$  of water molecules and choline, respectively. The bands assigned to asymmetric and symmetric stretching vibrations of the methyl and methylene groups were observed from  $3050$  to  $2750 \text{ cm}^{-1}$  and can be associated to fatty acids, lipids and cholesterol esters.<sup>3-6</sup> The maxima of the asymmetric,  $\nu_{\text{as}}(\text{CH}_3)$ , and symmetric bands,  $\nu_{\text{s}}(\text{CH}_3)$ , of the methyl groups were at  $2956$  and  $2872 \text{ cm}^{-1}$ , respectively; whereas asymmetric and symmetric bands of methylene groups,  $\nu_{\text{as}}(\text{CH}_2)$  and  $\nu_{\text{s}}(\text{CH}_2)$ , occurred at  $2921$  and  $2851 \text{ cm}^{-1}$ . At  $1735 \text{ cm}^{-1}$  is located the band associated with stretching vibrations of the carbonyl group  $\nu(\text{C=O})$ , usually due to ester bonds between fatty acids and glycerol. However, this bond can also be formed by peroxidation of fatty acid chains.<sup>7</sup> Subsequent bands  $1685\text{-}1634 \text{ cm}^{-1}$  were associated to amide vibration modes of ceramids.<sup>8</sup> The doublet at  $1578 \text{ cm}^{-1}$  and  $1540 \text{ cm}^{-1}$  corresponds to the asymmetric stretching vibration of carboxyl functional group. The bands at  $1470$  and  $1384 \text{ cm}^{-1}$  are assigned to bending vibrations of the methyl and methylene groups of fatty acids. The bands at  $1206$ ,  $1112$  and  $1026 \text{ cm}^{-1}$  can be assigned to a stretching vibration of the  $\text{C-O}$  group of lipid ester bond and to a stretching vibration of the phosphate group of phospholipids.<sup>9</sup>

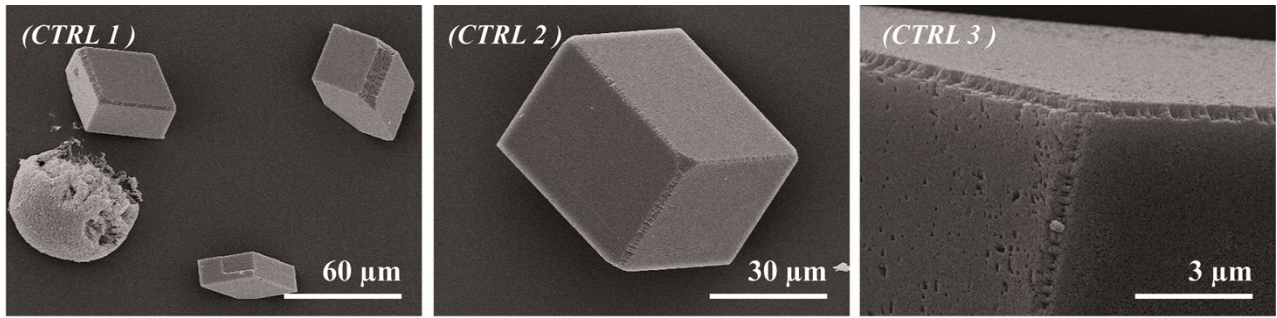

**Figure ESI1.** Scanning electron microscopy pictures at increasing magnification (1-3) of calcite crystals precipitated by the vapor diffusion method in the absence of additives.

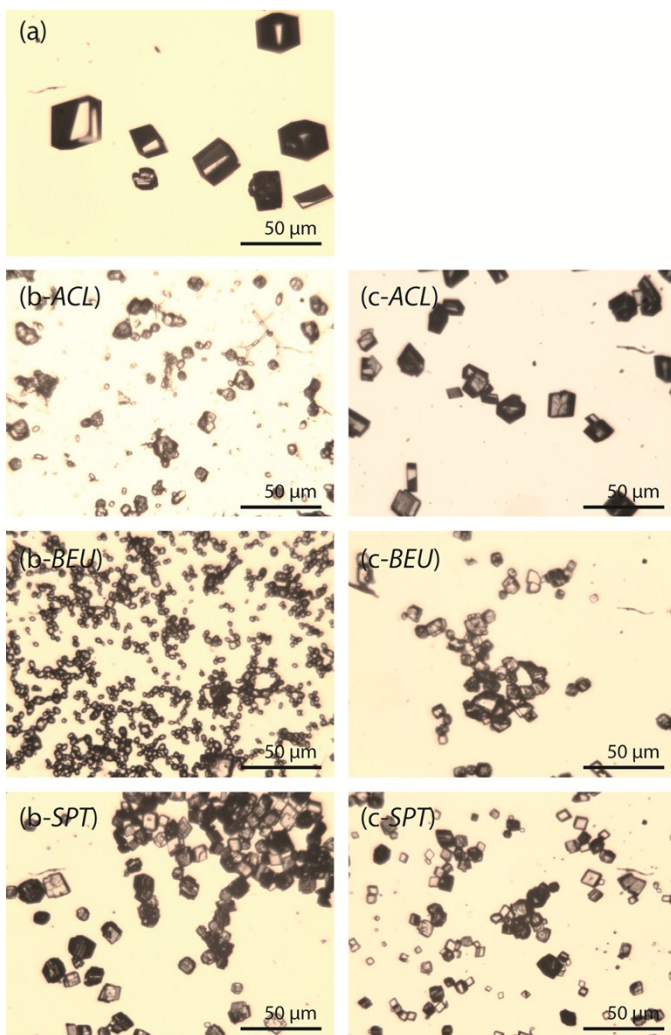

**Figure ESI2.** Optical microscope pictures of calcium carbonate particles precipitated in absence of additives (a), in the presence of wOM (b) and in the presence of lipOM (c) for *A. calycularis* (ACL), *B. europaea* (BEU) and *S. pistillata* (SPT).

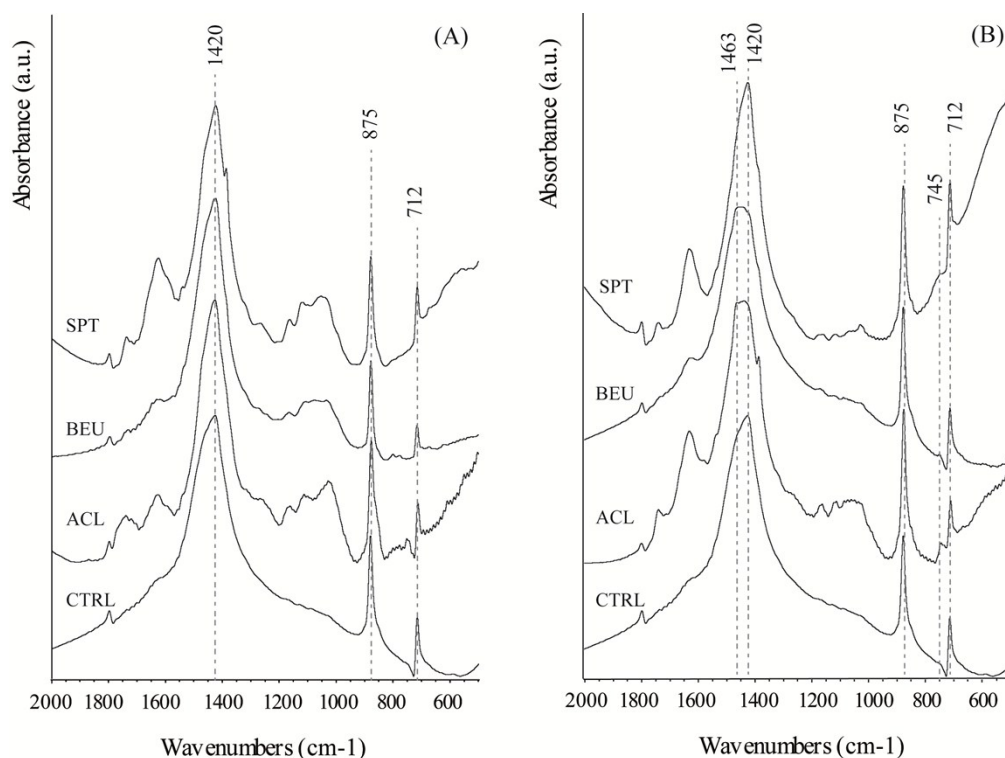

**Figure ESI3.** FTIR spectra of calcium carbonate precipitated from 10 mM CaCl<sub>2</sub> solutions in the presence of wOMs (A) and lipOM (B) which were extracted from the skeletons of *A. calycularis* (ACL), *B. europaea* (BEU), *S. pistillata* (SPT). FTIR spectrum of calcium carbonate precipitated from 10 mM CaCl<sub>2</sub> solution without additives is also reported (CTRL). The wavenumbers of the main absorption bands are indicated.

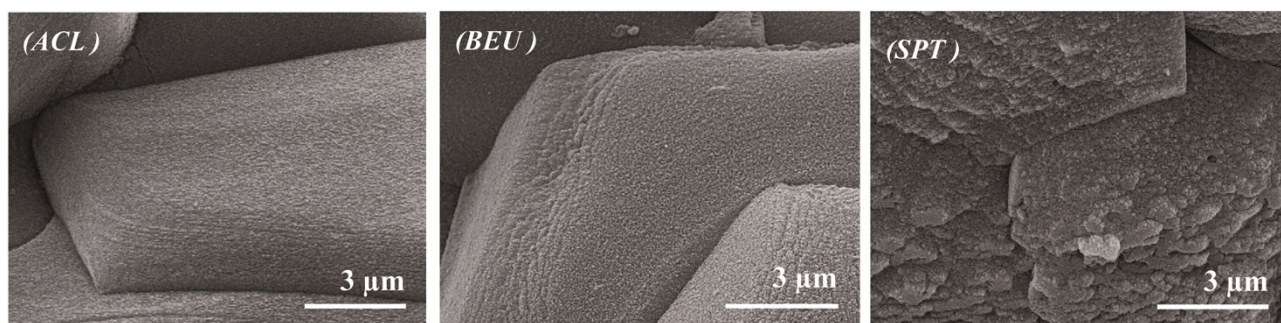

**Figure ESI4.** SEM images of the calcium carbonate precipitated in the presence of wOM from *A. calycularis* (ACL), *B. europaea* (BEU) and *S. pistillata* (SPT). Smoothed edges and corner of rhombohedral calcite crystals are showed. These pictures are the most representative of the populations of observed particles.

## References

1. G. Falini, M. Reggi, S. Fermani, F. Sparla, S. Goffredo, Z. Dubinsky, O. Levi, Y. Dauphin and J.-P. Cuif, *J. Struct. Biol.*, 2013, **183**, 226–238.
2. C. Beato, M. S. Fernandez, S. Fermani, M. Reggi, A. Neira-Carrillo, A. Rao, G. Falini and J. L. Arias, *CrystEngComm*, 2015, **17**, 5953–5961.
3. A. Rohman and Y. B. Che Man, *Vibr. Spectrosc.*, 2011, **55**, 141–145.
4. J. L. R. Arrondo and F. M. Goñi, *Chem. Phys. Lipids*, 1998, **96**, 53–68.
5. I. Dreissig, S. Machill, R. Salzer and C. Krafft, *Spectrochim. Acta A: Mol. Biomol. Spectr.*, 2009, **71**, 2069–2075.
6. J.-C. Tsai, Y.-L. Lo, C.-Y. Lin, H.-M. Sheu and J.-C. Lin, *Spectroscopy*, 2004, **18**, 423–431.
7. B. Fuchs, K. Bresler and J. Schiller, *Chem. Phys. Lipids*, 2011, **164**, 782–795.
8. M. E. Rerek, D. Van Wyck, R. Mendelsohn and D. J. Moore *Chem. Phys. Lipids*, 2005, **134**, 51–58.
9. J. M. Nzai and A. Proctor, *JAOCS*, 1998, **75**, 1281–1289.
